# Supplementary material
Source: MDPI journal article supplement (https://www.mdpi.com/2073-4352/12/8/1066)
Supplement: s1 [file s1]

# Synthesis of Two Novel Copper (II) Complexes as Potential Inhibitors of HIV-1 Protease Enzyme: Experimental and Theoretical Investigations

Meriem Hamlaoui <sup>1,\*</sup>, Ikram Hamlaoui <sup>2</sup>, Maamar Damous <sup>1,3</sup>, Youghourta Belhocine <sup>3,\*</sup>, Najoua Sbei <sup>4</sup>, Fatima Adam Mohamed Ali <sup>5</sup>, Mashaël A. Alghamdi <sup>5</sup>, Sarra Talab <sup>6</sup>, Seyfeddine Rahali <sup>7</sup> and Hocine Merazig <sup>1,\*</sup>

<sup>1</sup> Unité de Recherche de Chimie de l'Environnement et Moléculaire Structurale (URCHEMS), Département de Chimie, Université Frères Mentouri de Constantine, 25000 Constantine, Algeria; damousmmaamar@yahoo.fr

<sup>2</sup> Département de pharmacie, Faculté de médecine, Université Saleh Boubnider – Constantine 3, 25000, Constantine, Algeria; ikram.hamlaoui@univ-constantine3.dz

<sup>3</sup> Department of Process Engineering, Faculty of Technology, 20 August 1955 University of Skikda, P.O. Box 26, El Hadaik Road, Skikda 21000, Algeria

<sup>4</sup> Institute of Nanotechnology, Karlsruhe Institute of Technology, Eggenstein Leopoldshafen, 76344 Karlsruhe, Germany; najwasbei89@hotmail.fr

<sup>5</sup> Department of Chemistry, College of Science, Imam Mohammad Ibn Saud Islamic University (IMSIU), Riyadh 11432, Saudi Arabia; famohamedali@imamu.edu.sa; mabalghamdi@imamu.edu.sa

<sup>6</sup> Department of Chemistry, College of Applied and Industrial Science, University of Bahri, P.O. Box 11111, Khartoum 1660, Sudan; stalab9@gmail.com

<sup>7</sup> Department of Chemistry, College of Science and Arts, Qassim University, Ar Rass, Saudi Arabia; s.rahali@qu.edu.sa

\* Correspondence: hamlaoui.meriem@yahoo.fr (M.H.); y.belhocine@univ-skikda.dz (Y.B.); hmerazig@gmail.com (H.M.)

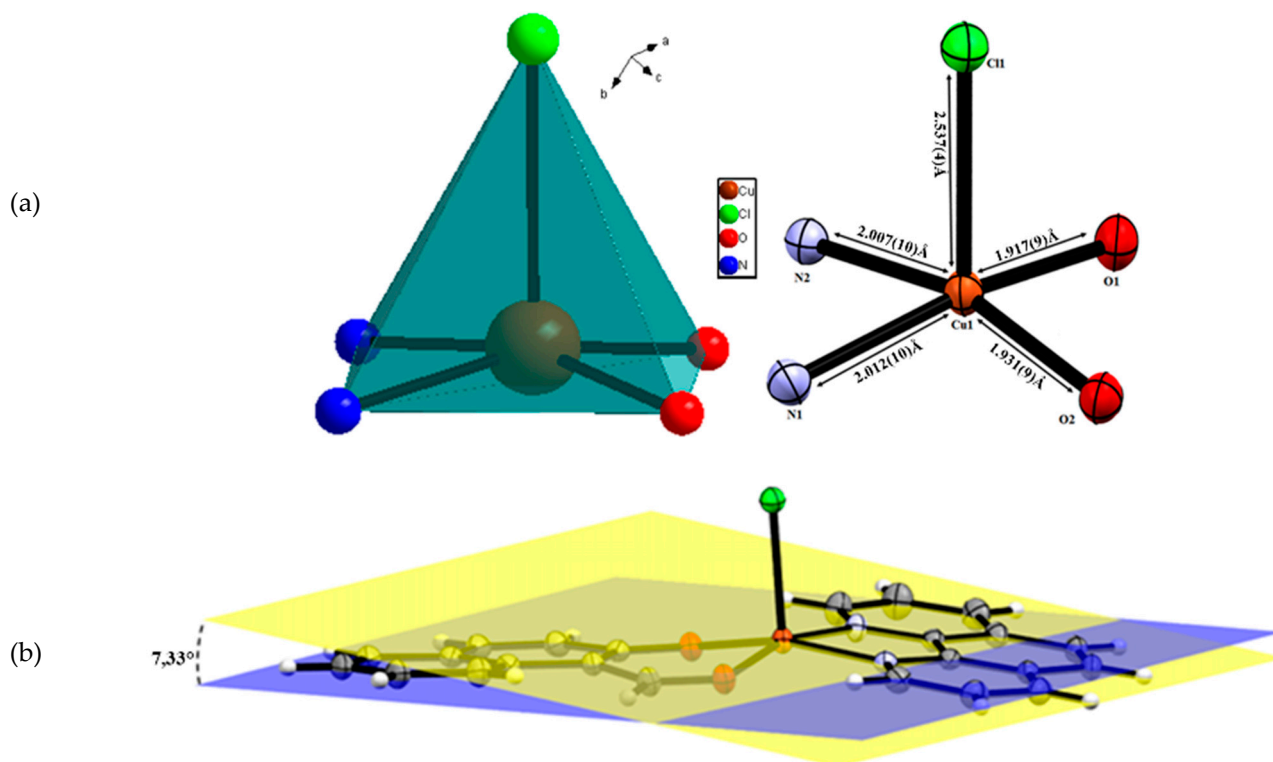

**Figure S1.** The copper square-pyramidal environment (a), and the dihedral angle between the two ligands (b) of C-2.

**Table S1.** Selected experimental and calculated bond lengths (Å) and angles (°) for C-1.

| Bond lengths (Å) | Experimental | Calculated |
|------------------|--------------|------------|
| Cu1- O1          | 1.908 (17)   | 1.946      |
| Cu1- O2          | 1.943 (18)   | 1.976      |
| Cu1- N2          | 2.001 (2)    | 2.040      |
| Cu1- N1          | 2.005 (19)   | 2.039      |
| Cu1- N3          | 2.188 (2)    | 2.138      |
| Angles (°)       |              |            |
| O1- Cu1- O2      | 91.79 (8)    | 89.62      |
| O1- Cu1- N2      | 162.97 (8)   | 162.00     |
| O2- Cu1- N2      | 92.24 (8)    | 92.73      |
| O1- Cu1- N1      | 91.19 (8)    | 92.70      |
| O2- Cu1- N1      | 164.11 (8)   | 162.03     |
| N2- Cu1- N1      | 80.63 (8)    | 79.76      |
| O1- Cu1- N3      | 99.23 (9)    | 105.30     |
| O2- Cu1- N3      | 93.77 (9)    | 103.14     |
| N2- Cu1- N3      | 97.01 (9)    | 91.54      |
| N1- Cu1- N3      | 101.15 (9)   | 93.43      |

**Table S2.** Selected experimental and calculated bond lengths (Å) and angles (°) for C-2.

| Bond lengths (Å) | Experimental | Calculated |
|------------------|--------------|------------|
| Cu1- O1          | 1.917 (9)    | 1.945      |
| Cu1- O2          | 1.931 (9)    | 1.985      |
| Cu1- N2          | 2.007 (10)   | 2.056      |
| Cu1-N1           | 2.012 (10)   | 2.047      |
| Cu1- Cl1         | 2.537 (4)    | 2.451      |
| Angles (°)       |              |            |
| O1- Cu1- O2      | 92.46 (4)    | 89.30      |
| O1- Cu1- N2      | 91.78 (4)    | 91.76      |
| O2- Cu1- N2      | 164.59 (4)   | 159.44     |
| O1- Cu1- N1      | 163.34 (4)   | 161.05     |
| O2- Cu1- N1      | 89.87 (4)    | 91.62      |
| N2- Cu1- N1      | 81.95 (4)    | 80.89      |
| O1- Cu1- Cl1     | 98.46 (3)    | 105.79     |
| O2- Cu1- Cl1     | 96.92 (3)    | 104.01     |
| N2- Cu1- Cl1     | 97.09 (3)    | 95.45      |
| N1- Cu1- Cl1     | 97.63 (3)    | 92.35      |
